# Supplementary material
Source: PubMed Central journal article supplement (PMC4979455)
Supplement: cddiscovery201518-s1.pdf [file cddiscovery201518-s1.pdf]

# Supplementary Figure 1

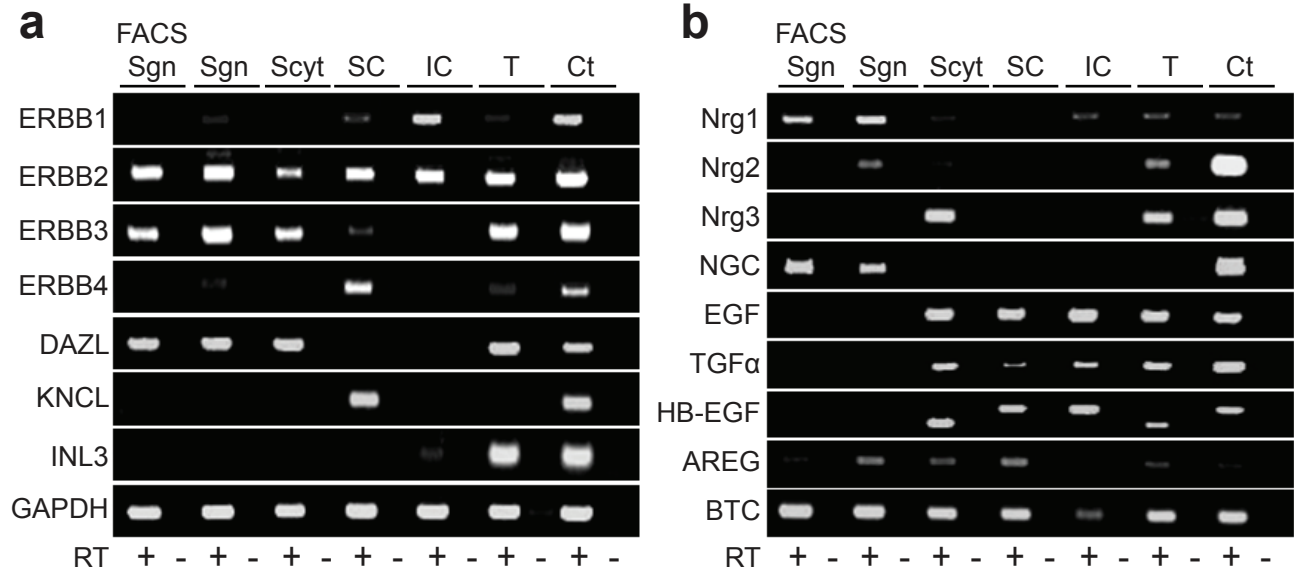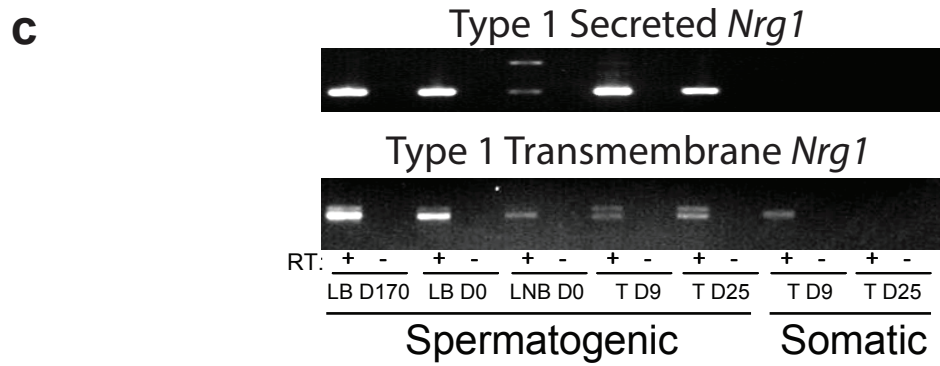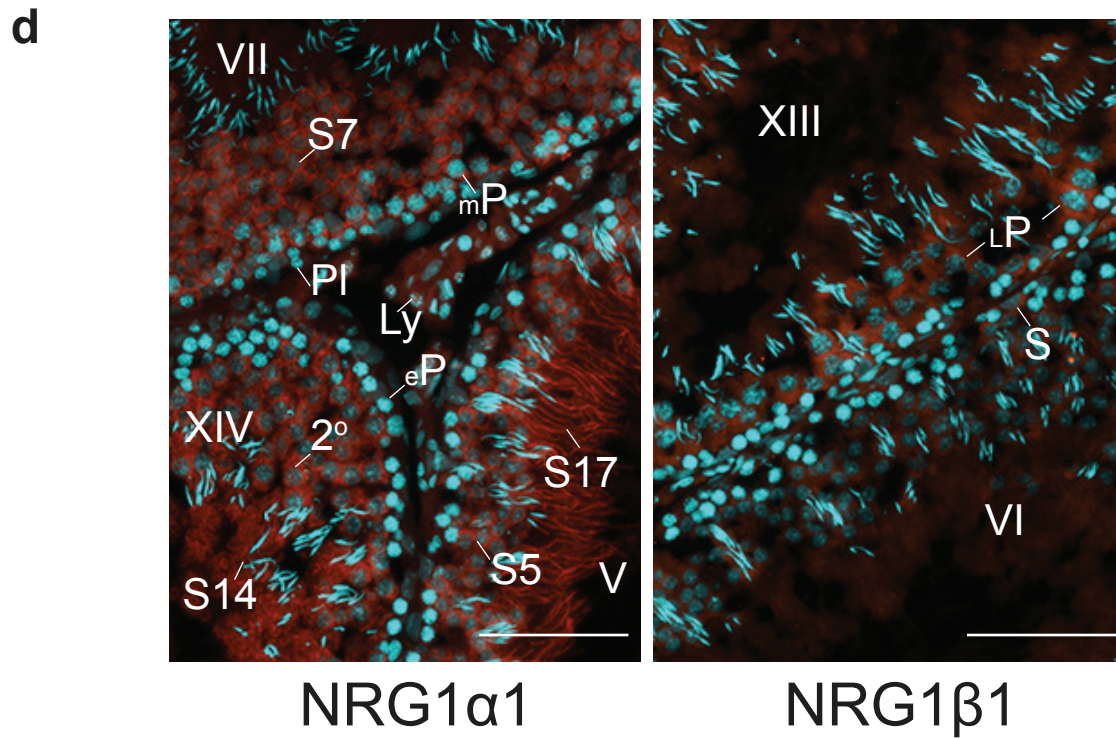

# Supplementary Figure 2

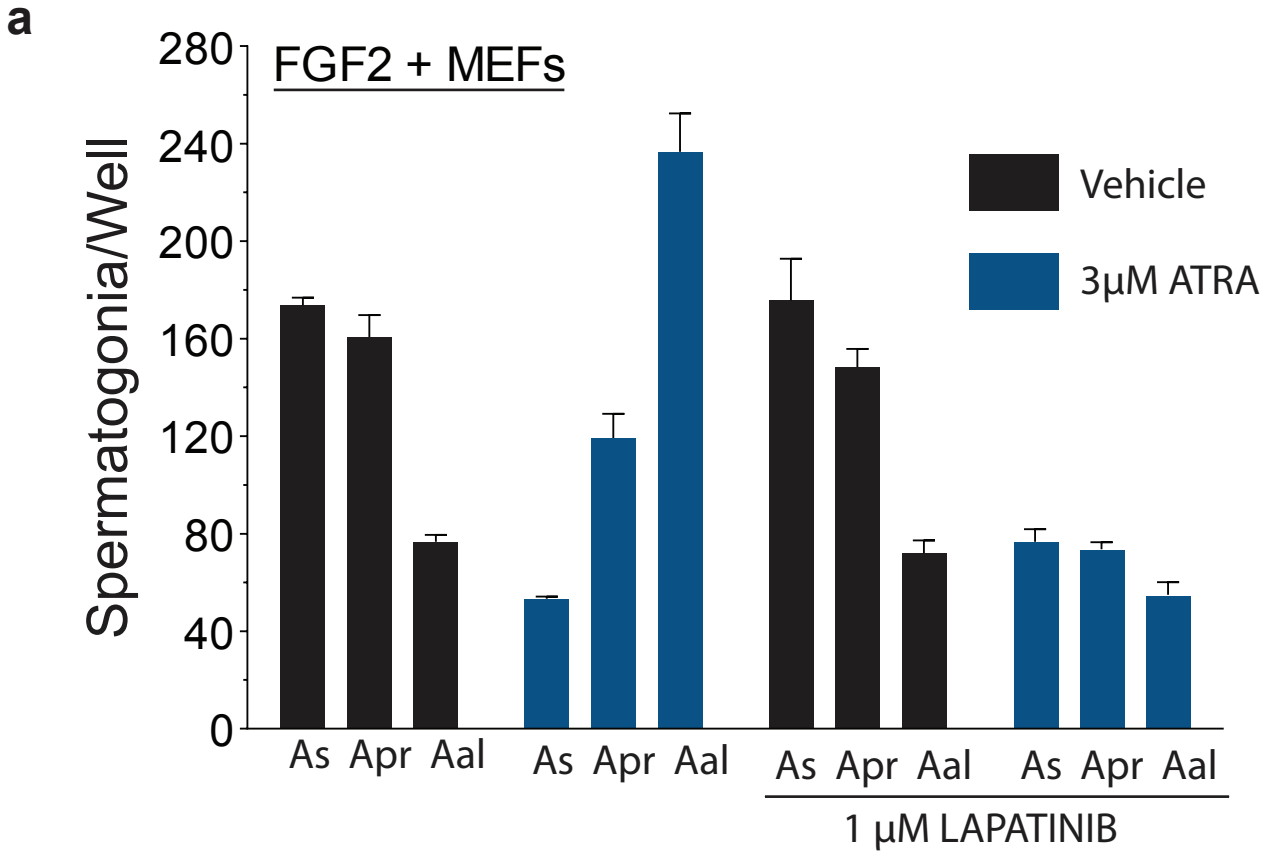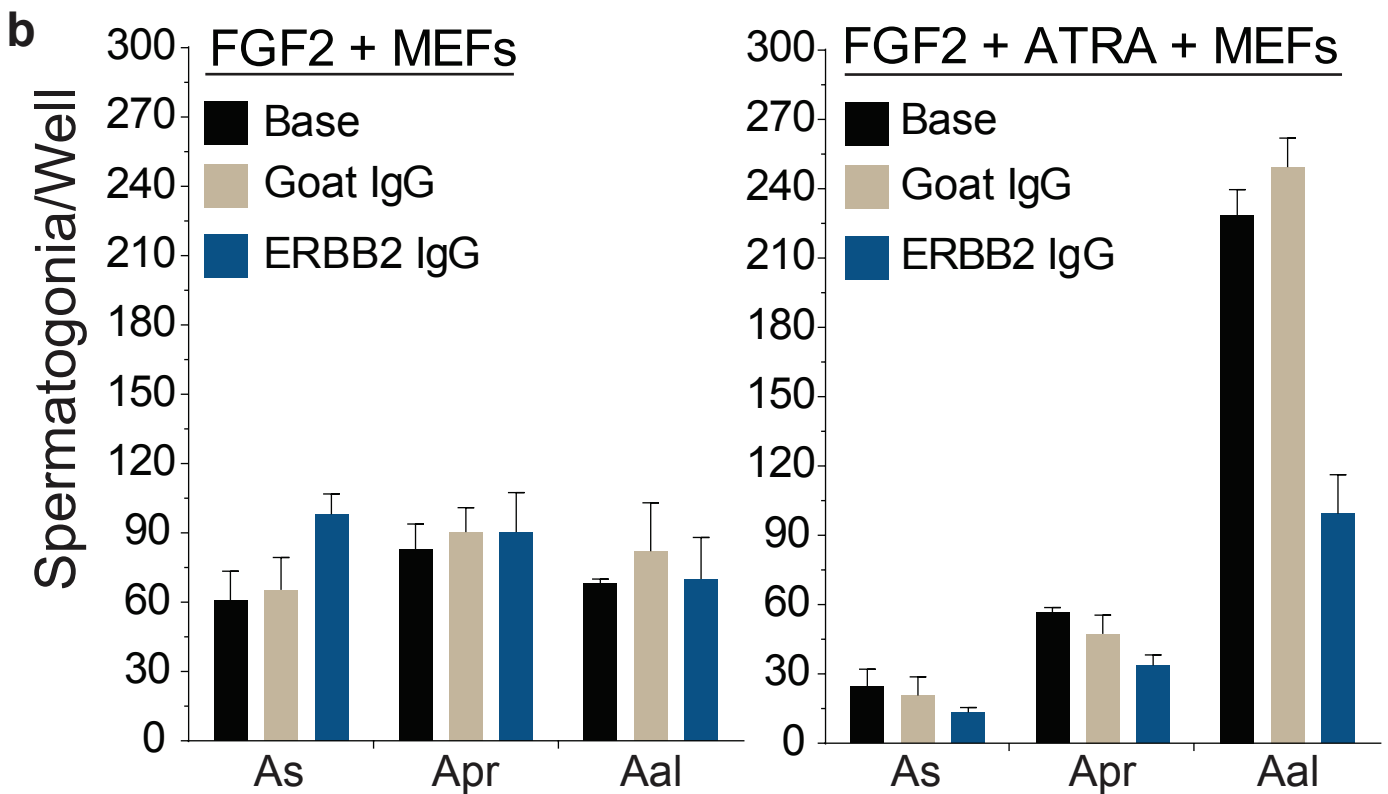

# Supplementary Figure 3

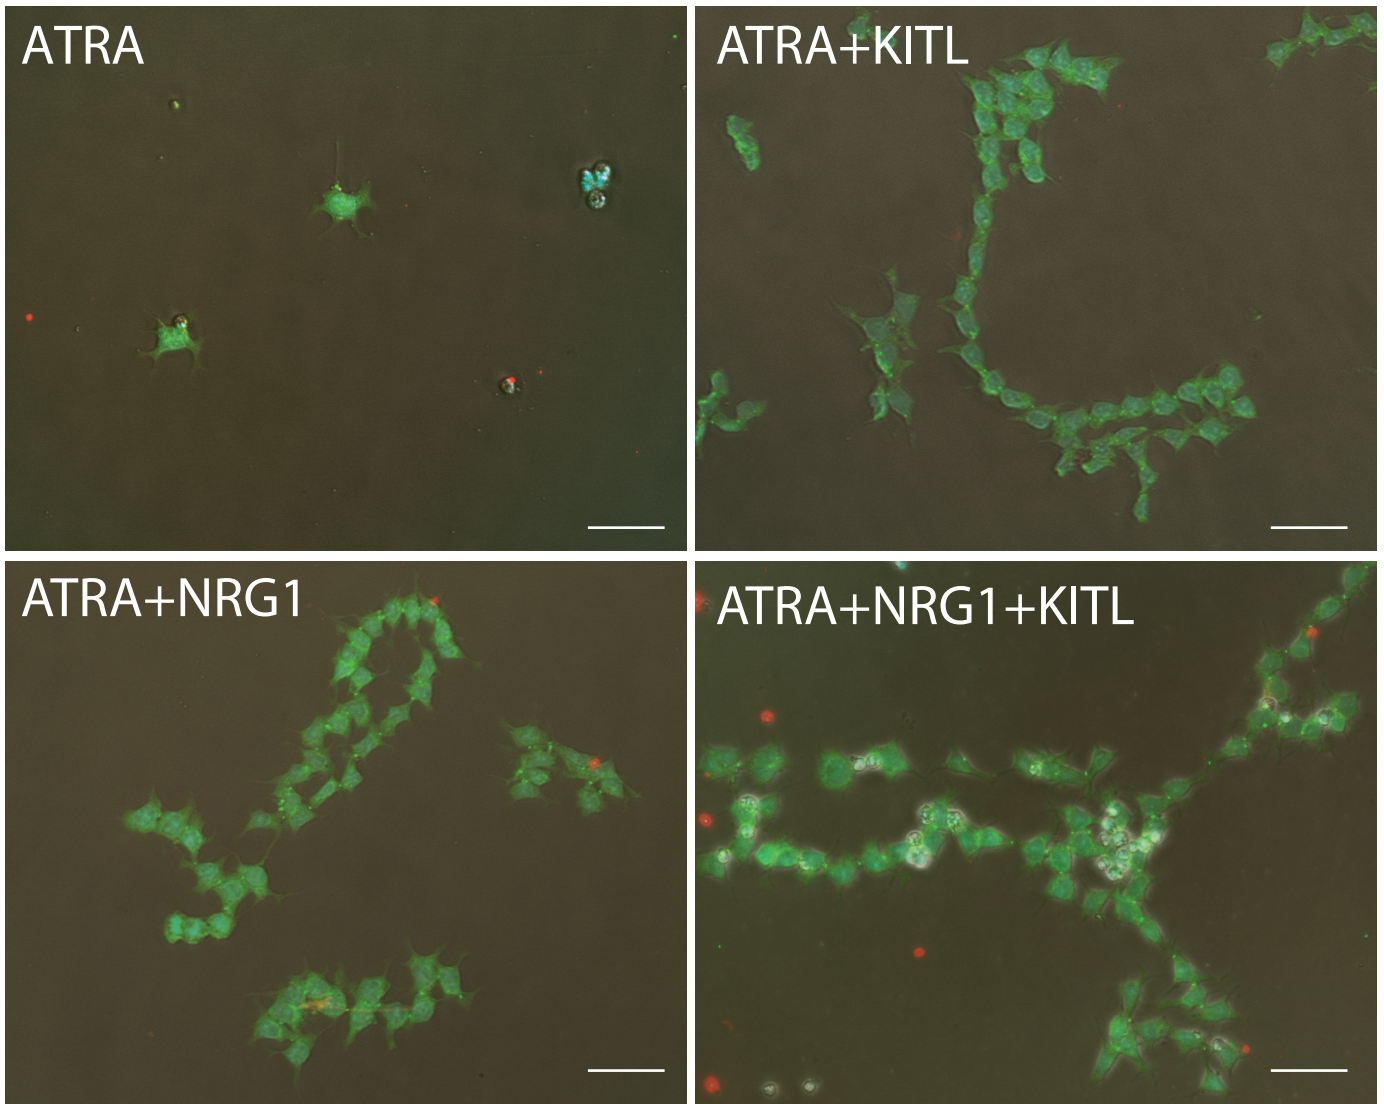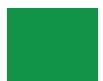

TEX14

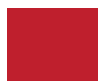

ZBTB16

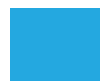

Hoechst 33342

## Supplementary Figure Legends

### Supp Figure 1. EGF-Superfamily Ligand and Receptor Expression in Rat Testis Cells.

**a.** RT-PCR analysis of *ErbB*-family transcripts in testis cells isolated from D23 tgGCS-EGFP transgenic rats. Template cDNAs were produced from freshly isolated cultures of laminin binding type A spermatogonia (Sg), differentiating spermatogonia/early spermatocytes (Scyt), tubular somatic cells (SC), interstitial somatic cells (IC) and total testis cells (T), as described. Samples of >99.8% pure tgGCS-EGFP<sup>+</sup> spermatogonia (FACS Sgn) were isolated by flow cytometry after 170 days/14 passages in culture on mouse embryonic fibroblasts (MEFs). Controls cDNAs (+Ct) were synthesized from D23 total testes (T). RT, Reverse Transcriptase.

**b.** RT-PCR analysis of *Egf*-family transcripts in testis cells isolated from D23 tgGCS-EGFP transgenic rats. Template cDNAs were produced from freshly isolated cultures of laminin binding type A spermatogonia (Sg), differentiating spermatogonia/early spermatocytes (Scyt), tubular somatic cells (SC), interstitial somatic cells (IC) and total testis cells (T), as in panel “a”. RT=Reverse Transcriptase. Controls cDNAs (+Ct) were synthesized from adult rat kidney (*Egf*), ovary (*Areg*, *Hbegf*, *Tgfaa*), brain (*Btc*, *Cspg5*, *Nrg2*) or D23 total testes (T) to identify optimal primer sets.

**c.** Full length Secreted and Transmembrane forms of Type-1 *Nrg1* transcripts amplified from germ cell cDNAs described in panel A using primers designed to 5-prime and 3-prime untranslated regions for variants of Type I, *Nrg1*. LB, laminin binding spermatogonia; LNB, laminin non-binding spermatogenic cells; T, EGFP<sup>+</sup> Spermatogenic or EGFP<sup>-</sup> Somatic testis cells flow sorted from 9 day old (D9) or 25 day old (D25) tgGCS-EGFP rats.

**d.** Immunolabeling for NRG1 $\alpha$ 1 and NRG1 $\beta$ 1 (red cytoplasm) in adult rat testis sections. Nuclei counterstained with Hoechst 33342 dye (cyan). eP=early Pachytene Spermatocyte; mP=mid-Pachytene Spermatocyte; lP=late Pachytene spermatocyte; S5, S8, S14, S17=Step 5, 8, 14, 17 spermatids; 2<sup>o</sup>=secondary spermatocyte; L=Leydig cells; S=Sertoli cell. Roman numerals denote spermatogenic stages<sup>1</sup>. Scale bar, 100  $\mu$ m.

### Supp Figure 2. ERBB2 Inhibitors Block Syncytial Spermatogenic Cell Growth on MEFs.

**a.** tgGCS-EGFP<sup>+</sup> spermatogonia scored/well ( $\pm$ SEM, triplicate wells) after culture on MEFs *without* GDNF, but with FGF2 (SG<sup>F</sup> Medium) for 1 week, and then for 6 additional days in the

same medium containing ATRA (3  $\mu$ M) and/or Lapatinib (1  $\mu$ M). tgGCS-EGFP as germ cell marker.

**b.** tgGCS-EGFP<sup>+</sup> spermatogonia scored/well ( $\pm$ SEM, triplicate wells) after culture on MEFs as described in panel A, but in the absence or presence of retinoic acid (3  $\mu$ M), and, with or without goat IgG (6  $\mu$ g/ml) or goat ERBB2 neutralizing IgG (ERBB2 IgG) (6  $\mu$ g/ml). Base, SG<sup>F</sup> Medium. A<sub>s</sub> = A-single spermatogonia; A<sub>pr</sub> = A-paired spermatogonia; A<sub>ai</sub> = spermatogonial syncytia containing 4-32 cells.

### **Supp Figure 3. Rat Differentiating Spermatogonia Cultures in SD Medium**

Spermatogonial cultures after 2 days in SG<sup>F</sup> Medium on laminin, followed by 6 days in SD Medium minus NRG1 and KITL (ATRA), or SD Medium containing NRG1 and/or KITL. ZBTB16 IgG (red), TEX14 IgG (green), Hoechst 33342 dye (blue). Scale, 50  $\mu$ m
